# Supplementary material for: Bulk Electroporation-Mediated Gene Transfer intoXenopusTadpole Brain
Source: HighWire-hosted journal article supplement (doi:10.1101/pdb.prot097691), 2018-05-16
Supplement: Supplemental_Movie_Legends.docx [file Supplemental_Movie_Legends.docx]

MOVIE LEGENDS

**Movie S1.** Filling the injection pipette with plasmid DNA solution (Step 11).

**Movie S2.** Injecting the tadpole brain (Steps 15-17).

**Movie S3.** Delivering the electric pulse (Steps 18-20).
